# Supplementary material for: Anillin regulates breast cancer cell migration, growth, and metastasis by non-canonical mechanisms involving control of cell stemness and differentiation
Source: PubMed Central journal article supplement (PMC6947866; doi:10.1186/s13058-019-1241-x), 2020-01-07
Supplement: 13058_2019_1241_MOESM12_ESM.pdf [file 13058_2019_1241_MOESM12_ESM.pdf]

**Supplementary Table S2. List of genes upregulated in anillin-deficient MDA-MB-231 cell lines as compared to control cells.**

“Geneid”, “symbol”, “description” - gene annotations; “logFC.1”, “logFC.2” - log fold change in the first and second CRISPR experiments, respectively; Average logFC” - average log fold change; “FDR.1”, “FDR.2” - FDR-adjusted p-value of differential expression in the first and second CRISPR experiments, respectively.

| Geneid   | logFC.1  | FDR.1    | logFC.2  | FDR.2    | Average logFC | symbol    | description                                                                                                                            |
|----------|----------|----------|----------|----------|---------------|-----------|----------------------------------------------------------------------------------------------------------------------------------------|
| ENSG0000 | 5.191235 | 1.05E-22 | 6.805635 | 1.51E-39 | 6.00          | KRT5      | keratin 5, type II [Source:HGNC Symbol;Acc:HGNC:6442]                                                                                  |
| ENSG0000 | 3.177175 | 0.000118 | 4.425871 | 9.31E-14 | 3.80          | KRT14     | keratin 14, type I [Source:HGNC Symbol;Acc:HGNC:6416]                                                                                  |
| ENSG0000 | 2.59171  | 0.010452 | 4.286461 | 1.06E-11 | 3.44          | FXYP3     | FXYP domain containing ion transport regulator 3 [Source:HGNC Symbol;Acc:HGNC:4027]                                                    |
| ENSG0000 | 3.572329 | 0.009345 | 2.950018 | 0.03658  | 3.26          | ID2       | inhibitor of DNA binding 2, dominant negative helix-loop-helix protein [Source:HGNC Symbol;Acc:HGNC:5361]                              |
| ENSG0000 | 1.561186 | 0.010945 | 4.870102 | 2.41E-47 | 3.22          | KRT6A     | keratin 6A, type II [Source:HGNC Symbol;Acc:HGNC:6443]                                                                                 |
| ENSG0000 | 2.26426  | 6.21E-07 | 2.390247 | 5.99E-09 | 2.33          | S100A14   | S100 calcium binding protein A14 [Source:HGNC Symbol;Acc:HGNC:18901]                                                                   |
| ENSG0000 | 1.966062 | 0.030373 | 2.466117 | 0.00247  | 2.22          | KRT6C     | keratin 6C, type II [Source:HGNC Symbol;Acc:HGNC:20406]                                                                                |
| ENSG0000 | 2.535002 | 2.03E-13 | 1.721424 | 2.11E-05 | 2.13          | TRNP1     | TMF1-regulated nuclear protein 1 [Source:HGNC Symbol;Acc:HGNC:34348]                                                                   |
| ENSG0000 | 2.29446  | 0.002283 | 1.744097 | 0.01837  | 2.02          | SNHG19    | small nucleolar RNA host gene 19 [Source:HGNC Symbol;Acc:HGNC:49574]                                                                   |
| ENSG0000 | 2.213019 | 0.005173 | 1.817592 | 0.019618 | 2.02          | RPS24P8   | ribosomal protein S24 pseudogene 8 [Source:HGNC Symbol;Acc:HGNC:37016]                                                                 |
| ENSG0000 | 1.159561 | 0.023739 | 2.676866 | 0.11E-14 | 1.92          | KRT6B     | keratin 6B, type II [Source:HGNC Symbol;Acc:HGNC:6444]                                                                                 |
| ENSG0000 | 2.444137 | 7.31E-13 | 1.34619  | 0.002892 | 1.90          | CA2       | carbonic anhydrase II [Source:HGNC Symbol;Acc:HGNC:1373]                                                                               |
| ENSG0000 | 2.18412  | 0.004091 | 1.567089 | 0.032215 | 1.88          | ATP5I     | ATP synthase, H+ transporting, mitochondrial Fo complex, subunit E [Source:HGNC Symbol;Acc:HGNC:846]                                   |
| ENSG0000 | 2.053339 | 1.97E-06 | 1.585704 | 0.000807 | 1.82          | DMKN      | dermokine [Source:HGNC Symbol;Acc:HGNC:25063]                                                                                          |
| ENSG0000 | 1.415831 | 0.002514 | 2.121103 | 4E-08    | 1.77          | KRT17     | keratin 17, type I [Source:HGNC Symbol;Acc:HGNC:6427]                                                                                  |
| ENSG0000 | 1.893473 | 0.006417 | 1.595668 | 0.019994 | 1.74          | CASP1     | caspace 1, apoptosis-related cysteine peptidase [Source:HGNC Symbol;Acc:HGNC:1499]                                                     |
| ENSG0000 | 2.159028 | 0.000762 | 1.329308 | 0.034252 | 1.74          | RPL41     | ribosomal protein L41 [Source:HGNC Symbol;Acc:HGNC:10354]                                                                              |
| ENSG0000 | 2.025157 | 0.006175 | 1.425193 | 0.04955  | 1.73          | SLIRP     | SRA stem-loop interacting RNA binding protein [Source:HGNC Symbol;Acc:HGNC:20495]                                                      |
| ENSG0000 | 2.145586 | 3.63E-06 | 1.30208  | 0.013482 | 1.72          | S100P     | S100 calcium binding protein P [Source:HGNC Symbol;Acc:HGNC:10504]                                                                     |
| ENSG0000 | 1.994439 | 0.005819 | 1.435636 | 0.011444 | 1.72          | RPS21     | ribosomal protein S21 [Source:HGNC Symbol;Acc:HGNC:10409]                                                                              |
| ENSG0000 | 2.021472 | 0.002448 | 1.302798 | 0.046794 | 1.66          | LINC00493 | long intergenic non-protein coding RNA 493 [Source:HGNC Symbol;Acc:HGNC:43430]                                                         |
| ENSG0000 | 1.882375 | 0.000325 | 1.40877  | 0.009575 | 1.65          | TAGLN     | transgelin [Source:HGNC Symbol;Acc:HGNC:11553]                                                                                         |
| ENSG0000 | 2.138867 | 1.32E-05 | 1.120827 | 0.034252 | 1.63          | PCBD1     | pterin-4 alpha-carbinolamine dehydratase/dimerization cofactor of hepatocyte nuclear factor 1 alpha [Source:HGNC Symbol;Acc:HGNC:8646] |
| ENSG0000 | 1.981834 | 0.002864 | 1.277759 | 0.04801  | 1.63          | COX7C     | cytochrome c oxidase subunit VIIc [Source:HGNC Symbol;Acc:HGNC:2292]                                                                   |
| ENSG0000 | 1.595848 | 0.026486 | 1.641244 | 0.021574 | 1.62          | SAA1      | serum amyloid A1 [Source:HGNC Symbol;Acc:HGNC:10513]                                                                                   |
| ENSG0000 | 1.878339 | 0.002149 | 1.341982 | 0.024999 | 1.61          | RPL22L1   | ribosomal protein L22-like 1 [Source:HGNC Symbol;Acc:HGNC:27610]                                                                       |
| ENSG0000 | 1.940176 | 0.002514 | 1.267095 | 0.041607 | 1.60          | RPL31     | ribosomal protein L31 [Source:HGNC Symbol;Acc:HGNC:10334]                                                                              |
| ENSG0000 | 1.955929 | 5.97E-05 | 1.225489 | 0.016278 | 1.59          | SNRPF     | small nuclear ribonucleoprotein polypeptide F [Source:HGNC Symbol;Acc:HGNC:11162]                                                      |
| ENSG0000 | 1.918648 | 0.001401 | 1.255811 | 0.036041 | 1.59          | SNRPF1    | small nuclear ribonucleoprotein polypeptide F pseudogene 1 [Source:HGNC Symbol;Acc:HGNC:16551]                                         |
| ENSG0000 | 1.8757   | 0.005073 | 1.295325 | 0.04758  | 1.59          | COX6B1    | cytochrome c oxidase subunit VIb polypeptide 1 (ubiquitous) [Source:HGNC Symbol;Acc:HGNC:2280]                                         |
| ENSG0000 | 1.868254 | 0.001155 | 1.30131  | 0.020996 | 1.58          | COX6C     | cytochrome c oxidase subunit VIc [Source:HGNC Symbol;Acc:HGNC:2285]                                                                    |
| ENSG0000 | 1.801228 | 0.005882 | 1.329628 | 0.036875 | 1.57          | HSP1      | heat shock 10kDa protein 1 [Source:HGNC Symbol;Acc:HGNC:5269]                                                                          |
| ENSG0000 | 1.654521 | 0.0144   | 1.472255 | 0.027298 | 1.56          | SEL1L3    | sel-1 suppressor of lin-12-like 3 (C. elegans) [Source:HGNC Symbol;Acc:HGNC:29108]                                                     |
| ENSG0000 | 1.883555 | 0.00259  | 1.223868 | 0.045348 | 1.55          | TMEM258   | transmembrane protein 258 [Source:HGNC Symbol;Acc:HGNC:1164]                                                                           |
| ENSG0000 | 1.821312 | 0.005357 | 1.268214 | 0.047805 | 1.54          | RPL35P5   | ribosomal protein L35 pseudogene 5 [Source:HGNC Symbol;Acc:HGNC:36955]                                                                 |
| ENSG0000 | 1.793079 | 0.006842 | 1.295094 | 0.047939 | 1.54          | UQCRI0    | ubiquinol-cytochrome c reductase, complex III subunit X [Source:HGNC Symbol;Acc:HGNC:30863]                                            |
| ENSG0000 | 1.665973 | 0.021635 | 1.416877 | 0.048637 | 1.54          | SNRPGP15  | small nuclear ribonucleoprotein polypeptide G pseudogene 15 [Source:HGNC Symbol;Acc:HGNC:49371]                                        |
| ENSG0000 | 1.860862 | 0.001519 | 1.221191 | 0.032762 | 1.54          | DBI       | diazepam binding inhibitor (GABA receptor modulator, acyl-CoA binding protein) [Source:HGNC Symbol;Acc:HGNC:2690]                      |
| ENSG0000 | 1.816695 | 0.004963 | 1.252127 | 0.04711  | 1.53          | COX5B     | cytochrome c oxidase subunit Vb [Source:HGNC Symbol;Acc:HGNC:2269]                                                                     |
| ENSG0000 | 1.867941 | 0.002432 | 1.191148 | 0.046794 | 1.53          | RPL36AL   | ribosomal protein L36a-like [Source:HGNC Symbol;Acc:HGNC:10346]                                                                        |
| ENSG0000 | 1.785438 | 0.006224 | 1.270592 | 0.048637 | 1.53          | DNPH1     | 2'-deoxynucleoside 5'-phosphate N-hydrolase 1 [Source:HGNC Symbol;Acc:HGNC:21218]                                                      |
| ENSG0000 | 1.840237 | 0.000827 | 1.180208 | 0.029547 | 1.51          | COX6A1P2  | cytochrome c oxidase subunit VIa polypeptide 1 pseudogene 2 [Source:HGNC Symbol;Acc:HGNC:35239]                                        |
| ENSG0000 | 1.773159 | 0.001413 | 1.235211 | 0.022311 | 1.50          | UQCRI1    | ubiquinol-cytochrome c reductase binding protein [Source:HGNC Symbol;Acc:HGNC:12582]                                                   |
| ENSG0000 | 1.920687 | 8.09E-06 | 1.059073 | 0.029208 | 1.49          | EMB       | embigin [Source:HGNC Symbol;Acc:HGNC:30465]                                                                                            |
| ENSG0000 | 1.709357 | 0.004747 | 1.269203 | 0.031037 | 1.49          | BOLA3     | boIA family member 3 [Source:HGNC Symbol;Acc:HGNC:24415]                                                                               |
| ENSG0000 | 1.800425 | 1.41E-05 | 1.165607 | 0.010259 | 1.48          | FABP5P7   | fatty acid binding protein 5 pseudogene 7 [Source:HGNC Symbol;Acc:HGNC:31070]                                                          |
| ENSG0000 | 1.784654 | 0.000108 | 1.170793 | 0.015678 | 1.48          | FAM216A   | family with sequence similarity 216, member A [Source:HGNC Symbol;Acc:HGNC:30180]                                                      |
| ENSG0000 | 1.783415 | 0.000572 | 1.136695 | 0.027384 | 1.46          | NDUFA12   | NADH dehydrogenase (ubiquinone) 1 alpha subcomplex, 12 [Source:HGNC Symbol;Acc:HGNC:23987]                                             |
| ENSG0000 | 1.774055 | 0.000952 | 1.134386 | 0.034108 | 1.45          | POP5      | POPS homolog, ribonuclease P/MRP subunit [Source:HGNC Symbol;Acc:HGNC:17689]                                                           |
| ENSG0000 | 1.687112 | 0.004747 | 1.155621 | 0.046703 | 1.42          | RPL35     | ribosomal protein L35 [Source:HGNC Symbol;Acc:HGNC:10344]                                                                              |
| ENSG0000 | 1.620425 | 0.002714 | 1.210912 | 0.022311 | 1.42          | HSP1P4    | heat shock 10kDa protein 1 pseudogene 4 [Source:HGNC Symbol;Acc:HGNC:49323]                                                            |
| ENSG0000 | 1.582981 | 0.008785 | 1.202943 | 0.044592 | 1.39          | COX7A2    | cytochrome c oxidase subunit VIIa polypeptide 2 (liver) [Source:HGNC Symbol;Acc:HGNC:2288]                                             |
| ENSG0000 | 1.677667 | 0.0015   | 1.100892 | 0.034107 | 1.39          | TXNP5     | thioredoxin pseudogene 5 [Source:HGNC Symbol;Acc:HGNC:49485]                                                                           |
| ENSG0000 | 1.599153 | 0.004855 | 1.13784  | 0.039018 | 1.37          | TXN       | thioredoxin [Source:HGNC Symbol;Acc:HGNC:12435]                                                                                        |
| ENSG0000 | 1.539107 | 0.006638 | 1.112708 | 0.047351 | 1.33          | SNRPG     | small nuclear ribonucleoprotein polypeptide G [Source:HGNC Symbol;Acc:HGNC:11163]                                                      |
| ENSG0000 | 1.606423 | 0.000462 | 1.028528 | 0.026461 | 1.32          | ABRACL    | ABRA C-terminal like [Source:HGNC Symbol;Acc:HGNC:21230]                                                                               |
| ENSG0000 | 1.574855 | 0.001519 | 1.05866  | 0.029543 | 1.32          | USMG5     | up-regulated during skeletal muscle growth 5 homolog (mouse) [Source:HGNC Symbol;Acc:HGNC:30889]                                       |
| ENSG0000 | 1.642508 | 3.71E-06 | 0.974495 | 0.013154 | 1.31          | C12orf75  | chromosome 12 open reading frame 75 [Source:HGNC Symbol;Acc:HGNC:35164]                                                                |
| ENSG0000 | 1.628964 | 0.000588 | 0.938244 | 0.048107 | 1.28          | RPS26P6   | ribosomal protein S26 pseudogene 6 [Source:HGNC Symbol;Acc:HGNC:31090]                                                                 |
| ENSG0000 | 1.515777 | 0.000952 | 1.011512 | 0.025845 | 1.26          | POLR2K    | polymerase (RNA) II (DNA directed) polypeptide K, 7.0kDa [Source:HGNC Symbol;Acc:HGNC:9198]                                            |
| ENSG0000 | 1.540155 | 0.000377 | 0.953996 | 0.028695 | 1.25          | ARPC3     | actin related protein 2/3 complex, subunit 3, 21kDa [Source:HGNC Symbol;Acc:HGNC:706]                                                  |
| ENSG0000 | 1.505931 | 0.001916 | 0.953258 | 0.044149 | 1.23          | ENY2      | enhancer of yellow 2 homolog (Drosophila) [Source:HGNC Symbol;Acc:HGNC:24449]                                                          |
| ENSG0000 | 1.408038 | 0.002109 | 0.877728 | 0.048958 | 1.15          | TXNP6     | thioredoxin pseudogene 6 [Source:HGNC Symbol;Acc:HGNC:49486]                                                                           |
| ENSG0000 | 1.523556 | 2.29E-06 | 0.735757 | 0.041329 | 1.13          | IL18      | interleukin 18 [Source:HGNC Symbol;Acc:HGNC:5986]                                                                                      |
| ENSG0000 | 1.367318 | 0.000108 | 0.759264 | 0.035726 | 1.06          | VPS29     | VPS29 retromer complex component [Source:HGNC Symbol;Acc:HGNC:14340]                                                                   |
| ENSG0000 | 1.210291 | 0.009356 | 0.910649 | 0.048637 | 1.06          | TPD52L1   | tumor protein D52-like 1 [Source:HGNC Symbol;Acc:HGNC:12006]                                                                           |
